# Supplementary material
Source: PubMed Central journal article supplement (PMC4201625)
Supplement: NIHMS308670-supplement-1_si_001.pdf [file NIHMS308670-supplement-1_si_001.pdf]

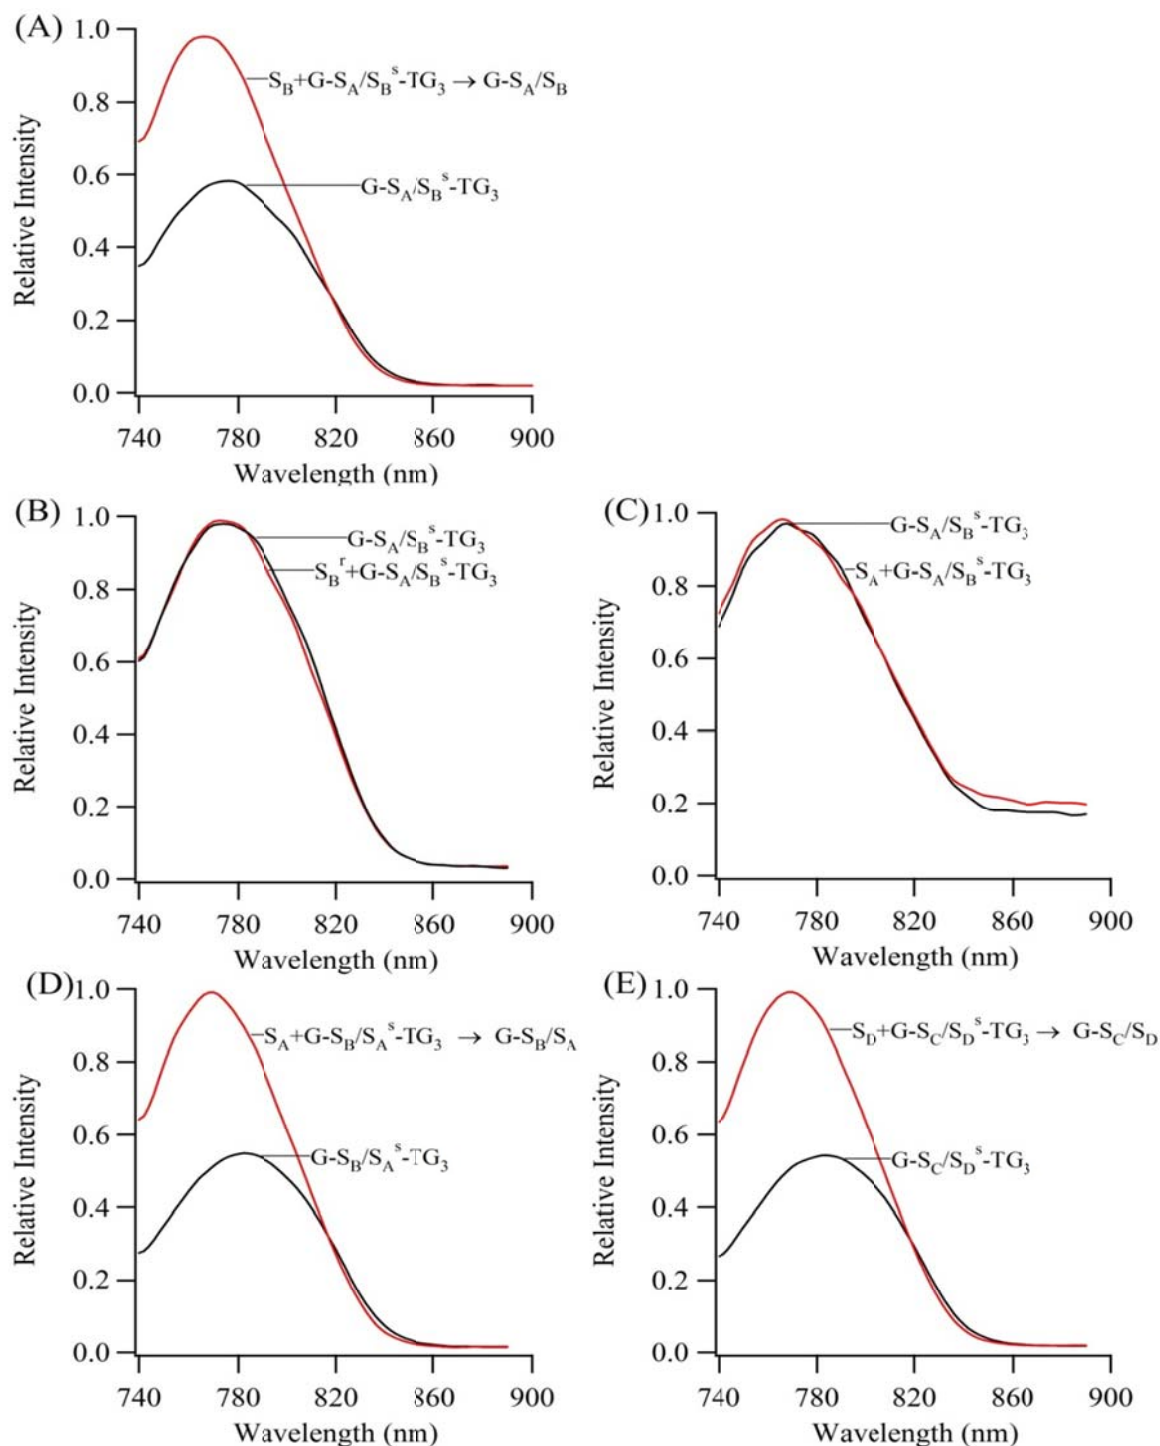

**Figure 1S:** Emission spectra associated with the reactions of the cluster conjugates of (A)  $G-S_A/S_B^S-TG_3$  with  $S_B$ , (B)  $G-S_A/S_B^S-TG_3$  with  $S_B^r$  (5'-TCCAGCGGCGGG-3'), (C)  $G-S_A/S_B^S-TG_3$  with  $S_A$  (5'-AGGTCGCCGCC-3'), (D)  $G-S_B/S_A^S-TG_3$  with  $S_A$ , and (E)  $G-S_C/S_D^S-TG_3$  with  $S_D$ . For (B) and (C), the lack of spectral response is attributed to targets that do not complement the recognition component  $S_A$ . As in (A), (D) and (E) show that target recognition of their complementary sites produces higher emission, indicating that the three cases share a common basis in hybridization.

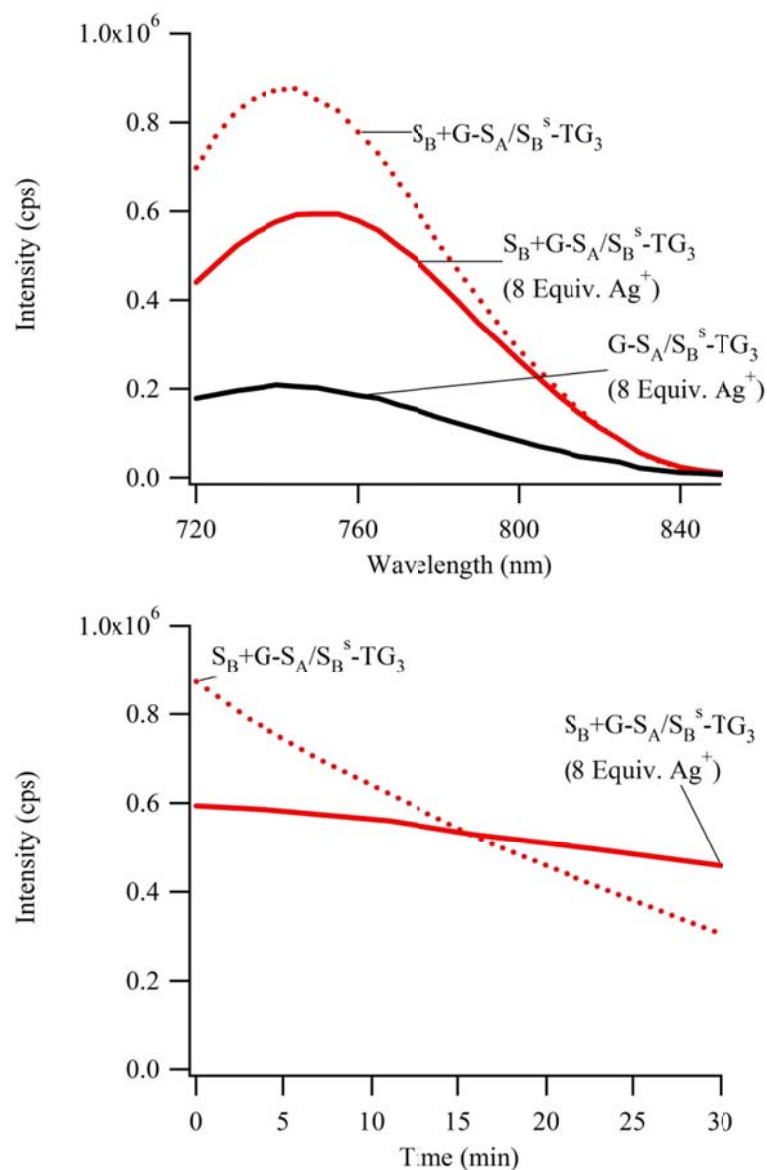

**Figure 2S:** (Top) Emission spectra for the clusters conjugated with  $G-S_A$  before (solid black line) and after (solid red line) exchange of  $S_B^s - TG_3$  with  $S_B$  in a buffer with 10% serum and with 8 additional equivalents of  $Ag^+$ . Relative to the cluster conjugate with  $G-S_A/S_B$  without additional  $Ag^+$  (dotted red line), the emission is lowered with additional  $Ag^+$ . (Bottom) Time-dependent intensity changes associated with the cluster complex with  $G-S_A/S_B$  in buffers with 10% serum with (solid red line) and without (dotted red line) an additional 8 equivalents of  $Ag^+$ .

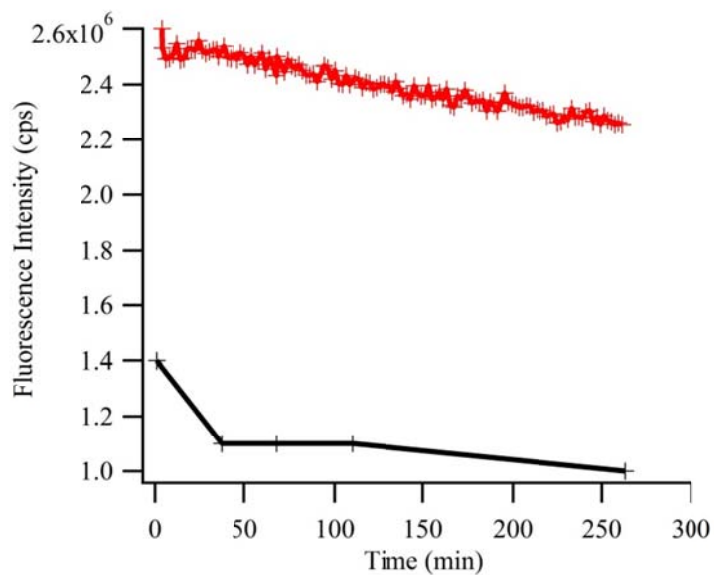

**Figure 3S:** Time profiles of the emission from the clusters bound to G-S<sub>A</sub>/S<sub>B</sub> (red) and G-S<sub>A</sub>/S<sub>B</sub><sup>S</sup>-TG<sub>3</sub> (black). Over the 4 hour time period, the signal for the former diminishes by 10% and the signal for the latter decreases 7%. Given the relatively rapid fluorescence changes that accompany strand exchange, the clusters are effectively stable in this available window of detection.
